# Supplementary material for: Tumor-repopulating cells evade ferroptosis via PCK2-dependent phospholipid remodeling
Source: Nat Chem Biol. 2024 May 8;20(10):1341–52. doi: 10.1038/s41589-024-01612-6 (PMC11427348; doi:10.1038/s41589-024-01612-6)

# Tumor-repopulating cells evade ferroptosis via PCK2-dependent phospholipid remodeling

In the format provided by the  
authors and unedited

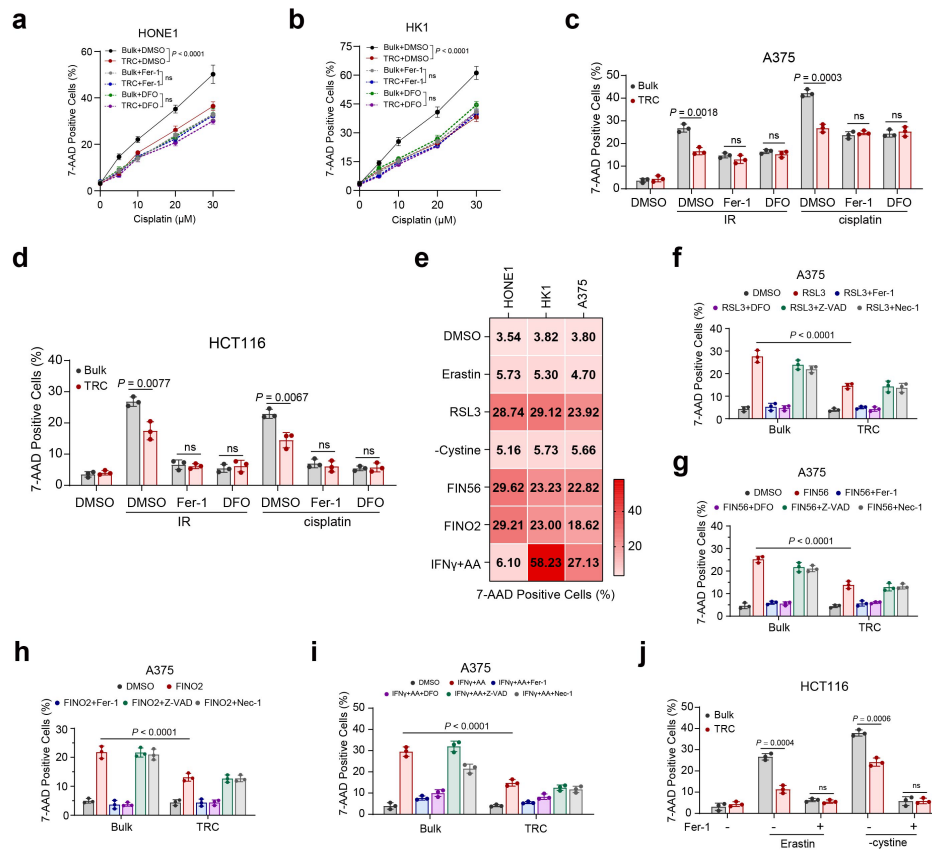

**Supplementary Fig.1 TRCs resist radiotherapy and chemotherapy via evading ferroptosis.**

**a-b**, Percentage of dead cells in TRCs and bulk tumor cells from HONE1 cells (**a**) or HK1 cells (**b**) treated with cisplatin in the absence or presence of Fer-1 and DFO.  $P = 1.09\text{E-}13$  and  $2.416\text{E-}20$ .

**c-d**, Percentage of dead cells in TRCs and bulk tumor cells from A375 (**c**) or HCT116 (**d**) treated with IR or cisplatin in the absence or presence of Fer-1 and DFO.

**e**, Heatmaps showing the percentage of dead cells of tumor cells treated with indicated ferroptosis inducers. Erastin, 5  $\mu$ M; RSL3, 10  $\mu$ M; -Cystine, cystine-free medium; FIN56, 10  $\mu$ M; FINO2, 10  $\mu$ M; IFN $\gamma$ , 30 ng/mL; AA, 25  $\mu$ M.

**f-i**, Percentage of dead cells in TRCs and bulk tumor cells from A375 treated with indicated inhibitors and RSL3 (**f**), FIN56 (**g**), FINO2 (**h**) or IFN $\gamma$ +AA (**i**). Fer-1, 1  $\mu$ M; Z-VAD (Z-VAD-FMK), 10  $\mu$ M; Nec-1 (Necrostatin-1), 2  $\mu$ M.  $P = 0.0000000399$ ,  $0.00000000607$ ,  $0.00000267$  and  $0.0000000025$ .

**j**, Percentage of dead cells in TRCs and bulk tumor cells from HCT116 treated with Fer-1 and indicated ferroptosis inducers.

Data are shown as mean  $\pm$  SD (a-d, f-j), unpaired two-tailed  $t$ -test (c-d, j), one-way ANOVA (f-i), two-way ANOVA (a-b).  $n = 3$  independent experiments. ns, not significant.

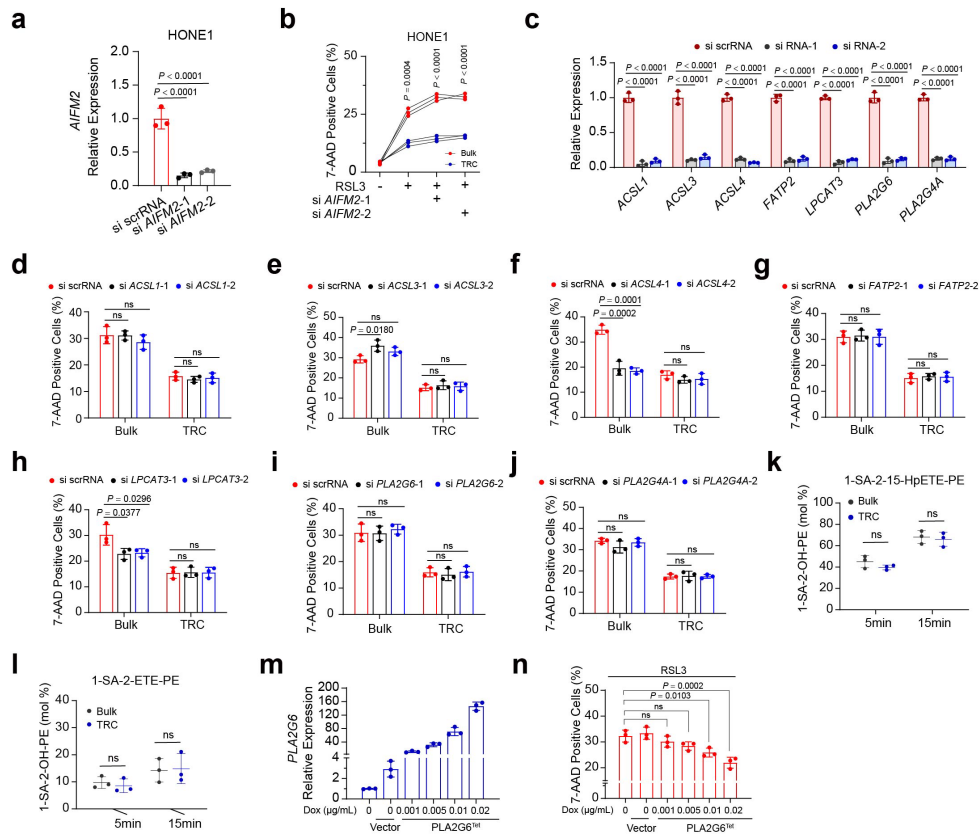

**Supplementary Fig.2 Interrogation the involvement of previously identified key genes in mediating resistance to ferroptosis in TRCs.**

**a,** The relative mRNA expression of *AIFM2* in HONE1 cells after transfecting with si-*AIFM2*.  $P = 0.0000734, 0.000114$  and  $0.69803$ .

**b,** Percentage of dead cells in HONE1 TRCs and bulk tumor cells treated with RSL3. si-*AIFM2* were transfected before the treatment of RSL3.  $P = 0.0004, 0.0000827$  and  $0.00002896$ .

**c,** The relative mRNA expression was analyzed by qRT-PCR for indicated gene knockdown efficiency in HONE1 cells.  $P = 0.00000096, 0.0000011, 0.0000031, 0.0000041, 0.00000015, 0.000000095, 0.00000037, 0.00000042, 0.0000000047, 0.0000000084, 0.0000013, 0.0000015, 0.00000021$  and  $0.00000022$ .

**d-j,** TRCs and bulk tumor cells from HONE1 cells were transfected with siRNAs specific for *ACSL1* (d), *ACSL3* (e), *ACSL4* (f), *FATP2* (g), *LPCAT3* (h), *PLA2G6* (i) or *PLA2G4A* (j) followed by treatment with RSL3. The percentage of dead cells was measured.

**k-l,** Time course of the formation of 1-SA-2-OH-PE (k) or 1-SA-2-OH-PE (l) in reactions catalyzed by iPLA2 $\beta$  purified from HONE1 TRCs and bulk cells. 1-SA-2-15-HpETE-PE (k) or 1-SA-2-ETE-PE (l) was used as substrates.

**m,** The mRNA expression of *PLA2G6* in HONE1 cells transfected with Dox-inducible *PLA2G6* expression vector and parental HONE1 cells.

**n,** Percentage of dead cells in Dox-inducible *PLA2G6* expression HONE1 cells and parental HONE1 cells treated with RSL3.

Data are shown as mean  $\pm$  SD, unpaired two-tailed *t*-test (b, k-l) or one-way ANOVA (a, c-j, n),  $n = 3$  independent experiments. ns, not significant.

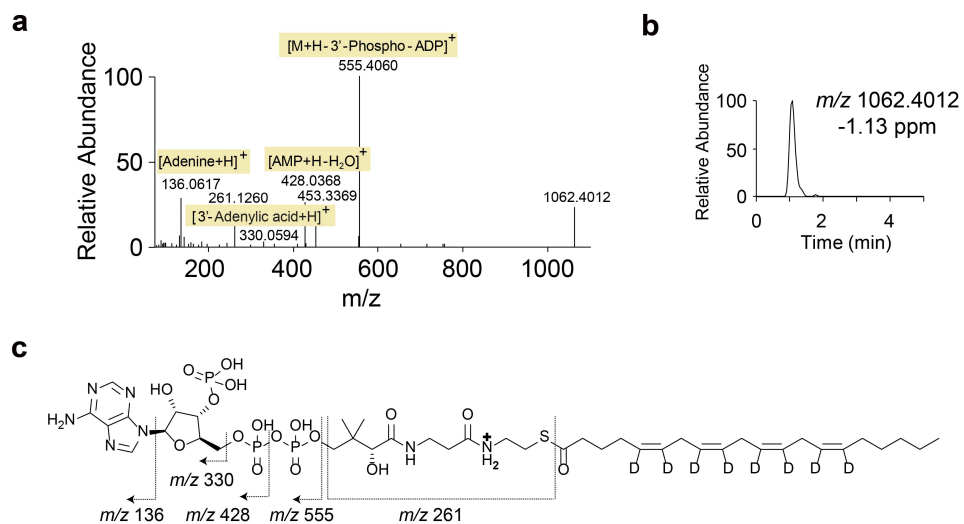

### Supplementary Figure 3: LC-MS-based characterization of AA-d8-CoA

**a-c**, Detection and identification of AA-d8-CoA, the synthetic product of AA-d8 and CoA. MS<sup>2</sup> fragmentation pattern of molecular ions with  $m/z = 1062.4012$ , corresponding to AA-d8-CoA (**a**). Base peak chromatogram of molecular ions with  $m/z = 1062.4012$ , corresponding to AA-d8-CoA (**b**). Respective structure and fragments formed during MS<sup>2</sup> analysis (**c**).

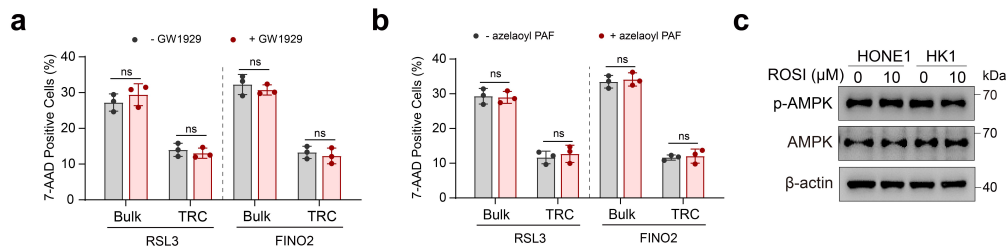

**Supplementary Fig.4 Interrogation the possibility that rosiglitazone exerted ferroptosis protective effect through PPAR $\gamma$  or AMPK.**

**a-b**, Percentage of dead cells in TRCs and bulk tumor cells from HONE1 cells co-treated with non-TZD PPAR $\gamma$  agonists GW1929 (**a**) or azelaoyl PAF (**b**) and RSL3 or FINO2.

**c**, Immunoblots showing the expression of p-AMPK and AMPK in HONE1 and HK1 cells treated with or without ACSL4 inhibitor rosiglitazone.

Data are shown as mean  $\pm$  SD, unpaired two-tailed *t*-test (a-b). *n* = 3 independent experiments. One of three experiments is shown (c). ns, not significant.

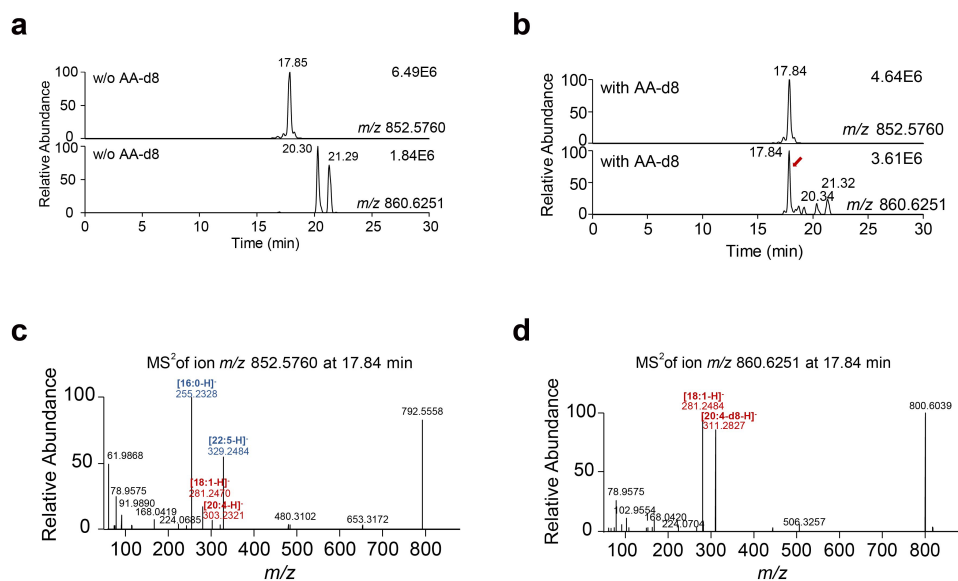

**Supplementary Figure 5: LC-MS-based characterization of PL-AA-d8**

**a**, Extract ion currents of  $[M+CHOO]^-$  ions of  $m/z$  852.5760 (PC (38:5)) and  $m/z$  860.6251 (PC (38:5)-d8) in tumor cells without AA-d8 treatment, respectively.

**b**, Extract ion currents of  $[M+CHOO]^-$  ions of  $m/z$  852.5760 (PC (38:5)) and  $m/z$  860.6251 (PC (38:5)-d8) in tumor cells with AA-d8 treatment, respectively. The red arrow points to the newly added chromatographic peak after AA-d8 treatment.

**c**, MS<sup>2</sup> of PC (38:5) (ion  $m/z$  852.5760 at 17.84 min). Characteristic fragments used for the identification of PC (16:0\_22:5) and PC (18:1\_20:4) are shown in blue and red, respectively.

**d**, MS<sup>2</sup> of PC (38:5)-d8 (ion  $m/z$  860.6251 at 17.84 min). Characteristic fragments used for the identification of PC (18:1\_20:4-d8) are shown in red.

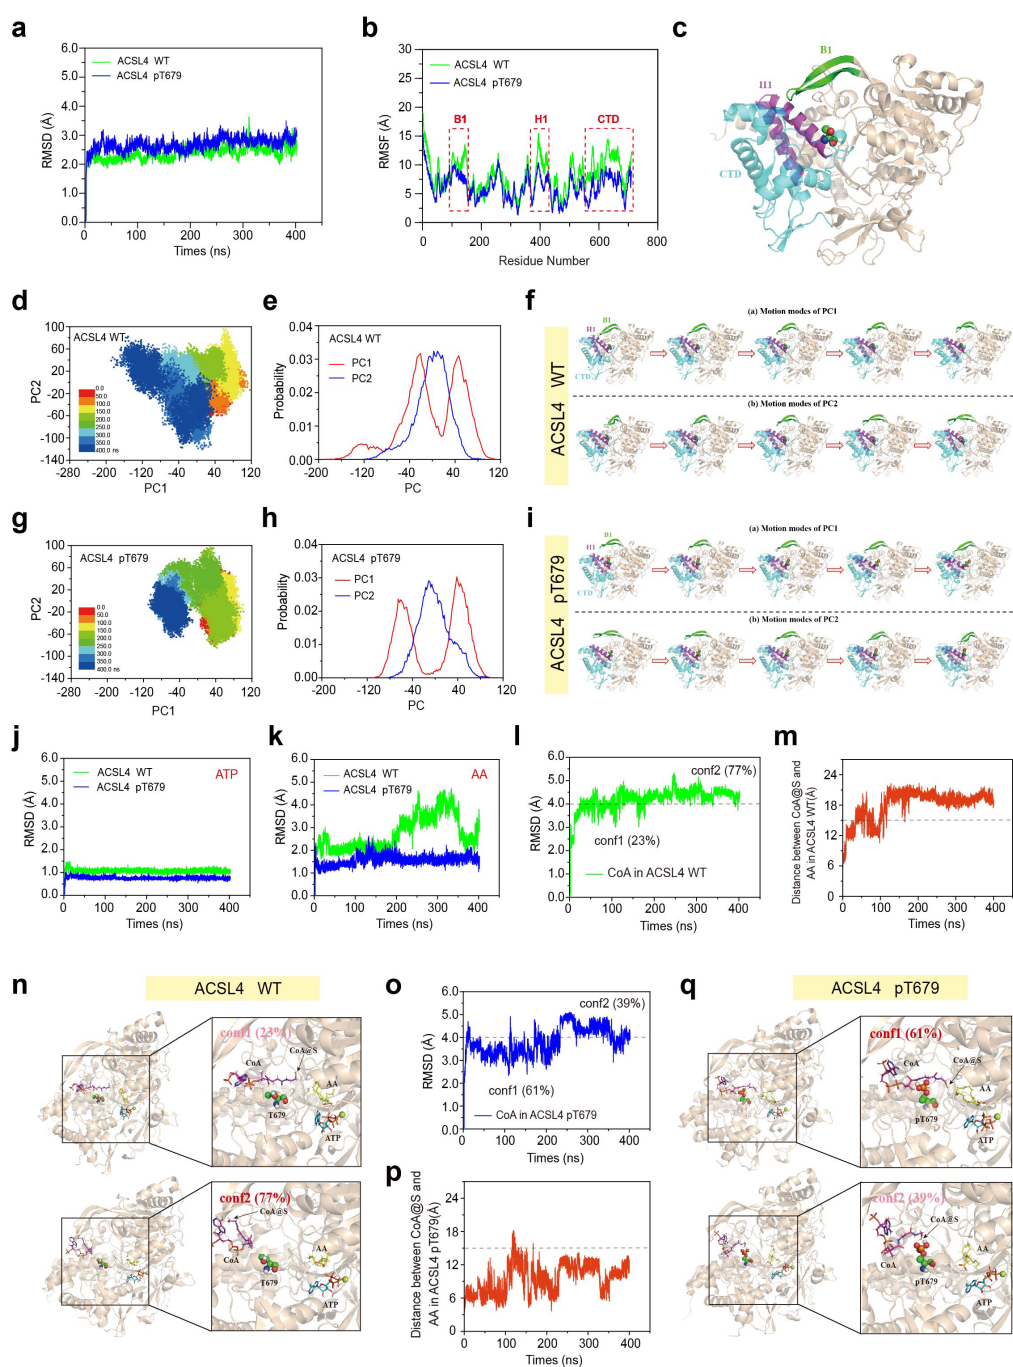

**Supplementary Fig.6 Molecular dynamics simulation for ACSL4 T679 phosphorylation.**

**a**, Root-mean-square deviations (RMSD) of the heavy atoms in ACSL4 protein in ACSL4<sup>WT</sup> model and ACSL4<sup>pT679</sup> model.

**b**, Root-mean-square fluctuations (RMSF) of each residue in MD simulations in ACSL4<sup>WT</sup> model and ACSL4<sup>pT679</sup> model.

**c**, The structure of ACSL4 was computationally modeled based on the AlphaFold2 package. B1 (green, residues 103-125), H1 (magenta, residues 375-420) and CTD (cyan, residues 552-711) were used to demonstrate structure differences between ACSL4<sup>WT</sup> model and ACSL4<sup>pT679</sup> model.

**d-e**, The variation trend of principal components (PC) with simulation time (**d**) and histogram of the PC (**e**) in ACSL4<sup>WT</sup> model during MD simulations.

- f**, Motion modes of PC1 and PC2 in ACSL4<sup>WT</sup> model during MD simulation. Top, the PC1 motion trajectory. Bottom, the PC2 motion trajectory.
- g-h**, The variation trend of PC with simulation time (**g**) and histogram of the PC (**h**) in ACSL4<sup>pT679</sup> model during MD simulations.
- i**, Motion modes of the PC1 and PC2 in ACSL4<sup>pT679</sup> model during MD simulation. Top, the PC1 motion trajectory. Bottom, the PC2 motion trajectory.
- j**, The heavy atoms RMSD of ATP in the MD simulations in ACSL4<sup>WT</sup> model and ACSL4<sup>pT679</sup> model. In both model, the RMSD of ATP rapidly reached a stable state at a very short time, and until the end of the simulations.
- k**, The heavy atoms RMSD of AA in the MD simulations of in ACSL4<sup>WT</sup> model and ACSL4<sup>pT679</sup> model. In ACSL4<sup>WT</sup> model, the RMSD of AA could not maintain stable in the last 200 ns.
- l**, The heavy atoms RMSD of substrate CoA. The proportion of “conf1” and “conf2” conformation in ACSL4<sup>WT</sup> model were 23% and 77%, respectively.
- m**, The distance change between the S atom of CoA and substrate AA in ACSL4<sup>WT</sup> model.
- n**, Representative structures of the substrate CoA in in ACSL4<sup>WT</sup> model during MD simulations.
- o**, The heavy atoms RMSD of substrate CoA. The proportion of “conf1” and “conf2” conformation in ACSL4<sup>pT679</sup> model were 61% and 39%, respectively.
- p**, The distance change between the S atom of CoA and substrate AA in ACSL4<sup>pT679</sup> model.
- q**, Representative structures of the substrate CoA in ACSL4<sup>pT679</sup> model during MD simulations.

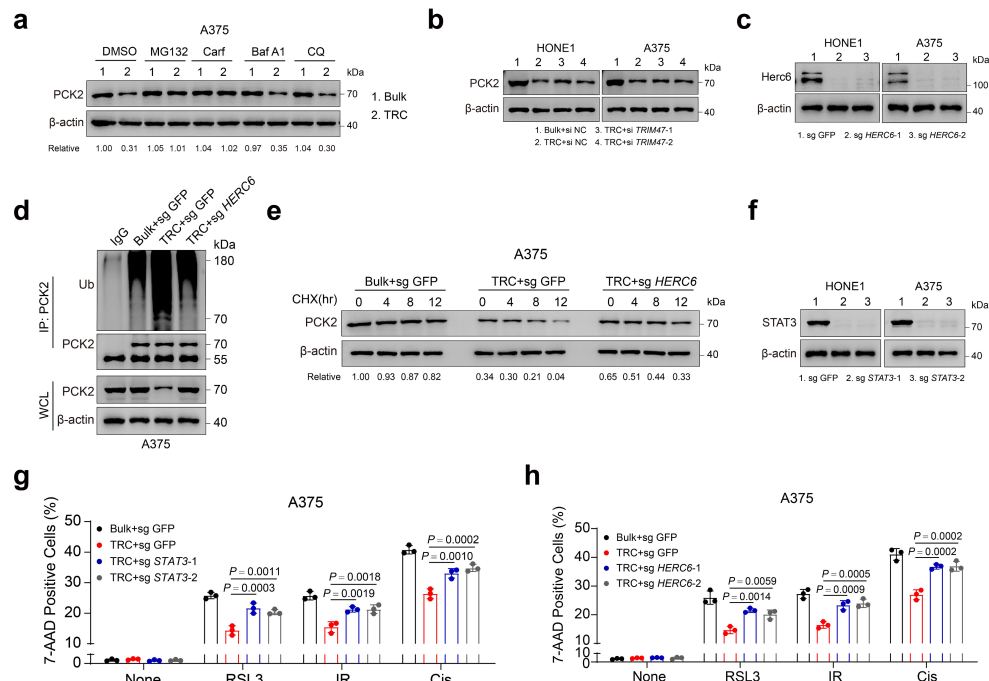

**Supplementary Fig.7 STAT3 promotes PCK2 degradation via HERC6-dependent proteasome pathway in TRCs.**

**a**, Immunoblots showing PCK2 protein level in A375 TRCs and bulk tumor cells treated with proteasome inhibitors MG132 (10  $\mu$ M), carfilzomib (100 nM), or autophagy inhibitor bafilomycin A1 (Baf A1), chloroquine (CQ).

**b**, Immunoblots showing the expression of PCK2 in TRCs and bulk tumor cells with or without *TRIM47* knockdown (A375).

**c**, Immunoblots of HERC6 in *HERC6* knockout cells and parental cells.

**d**, *HERC6*-knockout A375 cells (sg *HERC6*) or parental HONE1 cells (sg GFP) were cultured in 3D fibrin gels, after which the cell lysates were subjected to immunoprecipitation with anti-PCK2 antibody and immunoblotting with anti-ubiquitin (Ub) antibody.

**e**, Immunoblots showed that knocking out *HERC6* stabilized PCK2 protein in A375 TRCs with CHX treatment for indicated times.

**f**, Immunoblots of STAT3 in *STAT3*-knockout cells and parental cells.

**g**, TRCs from *STAT3*-knockout cells and parental cells, and bulk A375 cells were subjected to indicated treatments. The percentage of dead cells was measured.

**h**, TRCs from *HERC6*-knockout cells and parental cells, and bulk A375 cells were subjected to indicated treatments. The percentage of dead cells was measured.

Data are shown as mean  $\pm$  SD (g-h), one-way ANOVA (g-h). n = 3 independent experiments. One of three experiments is shown (a-f).

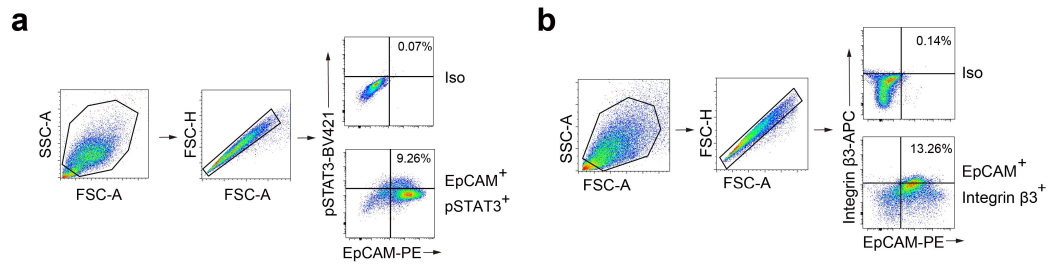

### Supplementary Figure 8: FACS gating strategy

**a**, Representative image of flow cytometric analysis, associated with Fig.6c and Extended Data Fig.9g.

**b**, EpCAM<sup>+</sup> integrin β3<sup>+</sup> and EpCAM<sup>+</sup> integrin β3<sup>-</sup> cells were sorted from HONE1 tumors of BALB/c nude mice. Representative image of flow cytometric analysis, associated with Fig.6d-g.

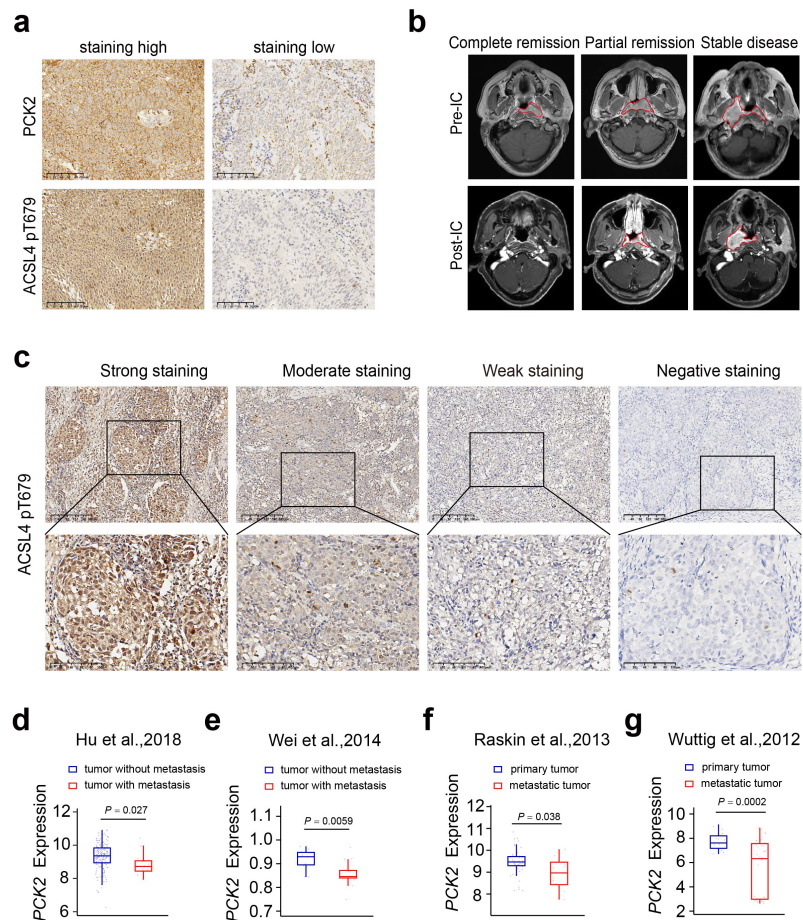

**Supplementary Fig.9 PCK2-ACSL4(T679) phosphorylation is related to better therapy response in NPC.**

**a,** Representative images of immunohistochemical staining for PCK2 and ACSL4 pT679 expression which are graded by the staining intensity in 182 NPC tumor tissues.

**b,** Representative magnetic resonance imaging of SYSUCC NPC cohort-1 before and after platinum-based induction chemotherapy. The red contour depicts radiographically evaluable tumors.

**c,** Representative images of immunohistochemical staining for ACSL4 pT679 expression which are graded by the staining intensity in 302 NPC tumor tissues.

**d,** Boxplot illustrated the *PCK2* expression in primary tumor with (n=16) or without metastasis (n=186) in GSE87211 cohort.

**e,** Boxplot illustrated the *PCK2* expression in primary tumor with (n=11) or without metastasis (n=13) in GSE45114 cohort.

**f,** Boxplot illustrated the *PCK2* expression in primary tumor tissues (n=46) and metastasis tumor tissues (n=12) in GSE15605 cohort.

**g,** Boxplot illustrated the *PCK2* expression in primary tumor tissues (n=17) and metastasis tumor tissues (n=44) in GSE22541 cohort.

**d-g,** Each dot represents a data point for individual patients. The comparison was based on the two-tailed Wilcoxon test.

**Supplementary Table 1.** Correlations between PCK2 or ACSL4 pT679 expression and clinicopathological characteristics in SYSUCC NPC cohort-1 (n = 182).

| Characteristic     | No. of patients | PCK2 expression       |                        | <i>P</i> value |
|--------------------|-----------------|-----------------------|------------------------|----------------|
|                    |                 | Low expression no.(%) | High expression no.(%) |                |
| Age                |                 |                       |                        |                |
| <45 years          | 71(39.0%)       | 38(35.8%)             | 33(43.4%)              | 0.302          |
| ≥45 years          | 111(61.0%)      | 68(64.2%)             | 43(56.6%)              |                |
| Sex                |                 |                       |                        |                |
| Male               | 128(70.3%)      | 74(69.8%)             | 54(71.1%)              | 0.857          |
| Female             | 54(29.7%)       | 32(30.2%)             | 22(28.9%)              |                |
| WHO type           |                 |                       |                        |                |
| II                 | 4(2.2%)         | 1(0.9%)               | 3(3.9%)                | 0.310          |
| III                | 178(97.8%)      | 105(99.1%)            | 73(96.1%)              |                |
| TNM Stage          |                 |                       |                        |                |
| I-II               | 8(4.4%)         | 7(6.6%)               | 1(1.3%)                | 0.142          |
| III-IV             | 174(95.6%)      | 99(93.4%)             | 75(98.7%)              |                |
| EBV DNA(copies/ml) |                 |                       |                        |                |
| <2000              | 124(68.1%)      | 77(72.6%)             | 47(61.8%)              | 0.123          |
| ≥2000              | 58(31.9%)       | 29(27.4%)             | 29(38.2%)              |                |
| VCA-IgA            |                 |                       |                        |                |
| <1:80              | 22(12.1%)       | 13(12.3%)             | 9(11.8%)               | 0.813          |
| ≥1:80              | 133(73.1%)      | 75(70.8%)             | 58(76.3%)              |                |
| NA                 | 27(14.8%)       | 18(17.0%)             | 9(11.8%)               |                |
| EA-IgA             |                 |                       |                        |                |
| <1:10              | 12(6.6%)        | 7(6.6%)               | 5(6.6%)                | 0.910          |
| ≥1:10              | 143(78.6%)      | 81(76.4%)             | 62(81.6%)              |                |
| NA                 | 27(14.8%)       | 18(17.0%)             | 9(11.8%)               |                |
| Response           |                 |                       |                        |                |
| CR                 | 17(9.3%)        | 6(5.7%)               | 11(14.5%)              | 0.024          |
| PR                 | 142(78.0%)      | 82(77.4%)             | 60(78.0%)              |                |
| SD                 | 23(12.6%)       | 18(17.0%)             | 5(6.6%)                |                |

CR: complete response; PR: partial response; SD: stable disease

| Characteristic     | No. of patients | ACSL4 pT679 expression |                        | <i>P</i> value |
|--------------------|-----------------|------------------------|------------------------|----------------|
|                    |                 | Low expression no.(%)  | High expression no.(%) |                |
| Age                |                 |                        |                        |                |
| <45 years          | 71(39.0%)       | 40(35.4%)              | 31(44.9%)              | 0.201          |
| ≥45 years          | 111(61.0%)      | 73(64.6%)              | 38(55.1%)              |                |
| Sex                |                 |                        |                        |                |
| Male               | 128(70.3%)      | 80(70.8%)              | 48(69.6%)              | 0.860          |
| Female             | 54(29.7%)       | 33(29.2%)              | 21(30.4%)              |                |
| WHO type           |                 |                        |                        |                |
| II                 | 4(2.2%)         | 1(0.9%)                | 3(4.3%)                | 0.153          |
| III                | 178(97.8%)      | 112(99.1%)             | 66(95.7%)              |                |
| TNM Stage          |                 |                        |                        |                |
| I-II               | 8(4.4%)         | 6(5.3%)                | 2(2.9%)                | 0.691          |
| III-IV             | 174(95.6%)      | 107(94.7%)             | 67(97.1%)              |                |
| EBV DNA(copies/ml) |                 |                        |                        |                |
| <2000              | 124(68.1%)      | 79(69.9%)              | 45(65.2%)              | 0.510          |
| ≥2000              | 58(31.9%)       | 34(30.1%)              | 24(34.8%)              |                |
| VCA-IgA            |                 |                        |                        |                |
| <1:80              | 22(12.1%)       | 14(12.4%)              | 8(11.6%)               | 0.757          |
| ≥1:80              | 133(73.1%)      | 80(70.8%)              | 53(76.8%)              |                |
| NA                 | 27(14.8%)       | 19(16.8%)              | 8(11.6%)               |                |
| EA-IgA             |                 |                        |                        |                |
| <1:10              | 12(6.6%)        | 8(7.1%)                | 4(5.8%)                | 0.891          |
| ≥1:10              | 143(78.6%)      | 86(76.1%)              | 57(82.6%)              |                |
| NA                 | 27(14.8%)       | 19(16.8%)              | 8(11.6%)               |                |
| Response           |                 |                        |                        |                |
| CR                 | 17(9.3%)        | 7(6.2%)                | 10(14.5%)              | 0.026          |
| PR                 | 142(78.0%)      | 87(77.0%)              | 55(79.7%)              |                |
| SD                 | 23(12.6%)       | 19(16.8%)              | 4(5.8%)                |                |

CR: complete response; PR: partial response; SD: stable disease

**Supplementary Table 2.** Correlations between ACSL4 pT679 expression levels and clinical features in SYSUCC NPC cohort-2 (n = 302).

| Characteristic            | No. of patients (%) | Low expression no.(%) | High expression no.(%) | P Value |
|---------------------------|---------------------|-----------------------|------------------------|---------|
| <b>Age</b>                |                     | 196                   | 106                    |         |
| ≤45 years                 | 158(52.3%)          | 103(52.6%)            | 55(51.9%)              | 0.912   |
| >45 years                 | 144(47.7%)          | 93(47.4%)             | 51(48.1%)              |         |
| <b>Sex</b>                |                     |                       |                        |         |
| Male                      | 78(25.8%)           | 46(23.5%)             | 32(30.2%)              | 0.203   |
| Female                    | 224(74.2%)          | 150(76.5%)            | 74(69.8%)              |         |
| <b>WHO type</b>           |                     |                       |                        |         |
| II                        | 13(4.3%)            | 10(5.1%)              | 3(2.8%)                | 0.353   |
| III                       | 289(95.7%)          | 186(94.9%)            | 103(97.2%)             |         |
| <b>Family history</b>     |                     |                       |                        |         |
| No                        | 259(85.8%)          | 169(86.2%)            | 90(84.9%)              | 0.754   |
| Yes                       | 43(14.2%)           | 27(13.8%)             | 16(15.1%)              |         |
| <b>T stage</b>            |                     |                       |                        |         |
| T1-2                      | 50(16.6%)           | 32(16.3%)             | 18(17.0%)              | 0.884   |
| T3-4                      | 252(83.4%)          | 164(83.7%)            | 88(83.0%)              |         |
| <b>N stage</b>            |                     |                       |                        |         |
| N0-1                      | 162(53.6%)          | 100(51.0%)            | 62(58.5%)              | 0.214   |
| N2-3                      | 140(46.4%)          | 96(49.0%)             | 44(41.5%)              |         |
| <b>Stage</b>              |                     |                       |                        |         |
| III                       | 161(53.3%)          | 102(52.0%)            | 59(55.7%)              | 0.547   |
| IV                        | 141(46.7%)          | 94(48.0%)             | 47(44.3%)              |         |
| <b>EBV DNA(copies/ml)</b> |                     |                       |                        |         |
| <2000                     | 147(48.7%)          | 100(51.0%)            | 47(44.3%)              | 0.268   |
| ≥2000                     | 155(51.3%)          | 96(49.0%)             | 59(55.7%)              |         |
| <b>VCA-IgA</b>            |                     |                       |                        |         |
| <1:80                     | 41(13.6%)           | 25(12.8%)             | 16(15.1%)              | 0.571   |
| ≥1:80                     | 261(86.4%)          | 171(87.2%)            | 90(84.9%)              |         |
| <b>EA-IgA</b>             |                     |                       |                        |         |
| <1:10                     | 60(19.9%)           | 36(18.4%)             | 24(22.6%)              | 0.374   |
| ≥1:10                     | 242(80.1%)          | 160(81.6%)            | 82(77.4%)              |         |

**Supplementary Table 3.** Univariate and multivariate analysis of clinicopathological characteristics and overall survival in SYSUCC NPC cohort-2.

|                                | Univariate | Multivariate | HR                 | P value |
|--------------------------------|------------|--------------|--------------------|---------|
| <b>Age</b>                     |            |              |                    |         |
| ≤45 years                      | 0.019      |              |                    | NS      |
| >45 years                      |            |              |                    |         |
| <b>Sex</b>                     |            |              |                    |         |
| Male                           | 0.005      |              | 2.096(1.163-3.777) | 0.014   |
| Female                         |            |              |                    |         |
| <b>WHO type</b>                |            |              |                    |         |
| II                             | 0.008      |              | 0.428(0.206-0.887) | 0.022   |
| III                            |            |              |                    |         |
| <b>Family history</b>          |            |              |                    |         |
| No                             | 0.492      | n.d.         |                    |         |
| Yes                            |            |              |                    |         |
| <b>T stage</b>                 |            |              |                    |         |
| T1-2                           | 0.404      | n.d.         |                    |         |
| T3-4                           |            |              |                    |         |
| <b>N stage</b>                 |            |              |                    |         |
| N0-1                           | 0.005      |              |                    | NS      |
| N2-3                           |            |              |                    |         |
| <b>Stage</b>                   |            |              |                    |         |
| III                            | 0.001      |              | 1.901(1.252-2.886) | 0.003   |
| IV                             |            |              |                    |         |
| <b>EBV DNA<br/>(copies/ml)</b> |            |              |                    |         |
| <2000                          | 0.454      | n.d.         |                    |         |
| ≥2000                          |            |              |                    |         |
| <b>VCA-IgA</b>                 |            |              |                    |         |
| <1:80                          | 0.074      | n.d.         |                    |         |
| ≥1:80                          |            |              |                    |         |
| <b>EA-IgA</b>                  |            |              |                    |         |
| <1:10                          | 0.167      | n.d.         |                    |         |
| ≥1:10                          |            |              |                    |         |
| <b>ACSL4 pT679</b>             |            |              |                    |         |
| Low expression                 | <0.0001    |              | 0.371(0.219-0.631) | 0.0002  |
| High expression                |            |              |                    |         |

**Supplementary Table 4.** Primer sequences for qRT-PCR, siRNA and sgRNA assays.

| Name                         | Forward                       | Reverse                      |
|------------------------------|-------------------------------|------------------------------|
| Primer sequences for qRT-PCR |                               |                              |
| Human GAPDH                  | 5'-TGATGACATCAAGAAGGTGG-3'    | 5'-TTGTCATACCAGGAAATGAGC-3'  |
| Human AIFM2                  | 5'-GTGAGCGGGTGAGCAATCT-3'     | 5'-CTTGATGCCGGTGCAGAGAA-3'   |
| Human PCK2                   | 5'-AGTAGAGAGCAAGACGGTGAT-3'   | 5'-TGCTGAATGGAAGCACATACAT-3' |
| Human HERC6                  | 5'-CCACTCCCTGGCATTATCAAAA-3'  | 5'-GCCAAACGAAGTCCCACAGA-3'   |
| Human RNF215                 | 5'-GGAGACTGGCATCCCTCAAGA-3'   | 5'-GGTGAAACTCGTGCTTACAGG-3'  |
| Human RNF207                 | 5'-GGCGGAGATCATGGGAGAC-3'     | 5'-CACTCGCTGATAGGCTTCCTC-3'  |
| Human RNF39                  | 5'-AGCCTGAGGTCTAATGTGCG-3'    | 5'-GTTGGGACTTCAAATCGTCTCC-3' |
| Human RNF208                 | 5'-GGATGAGGTCATTGTGAATCAGT-3' | 5'-GCTGGGTGACATTGTAGGAGTG-3' |
| Human TMEM129                | 5'-CTCTGTCAACACTGAGTTCCG-3'   | 5'-GACTCCGTCACAGTCAGGTG-3'   |
| Human TRIM47                 | 5'-TGTGTCCTATCAACTACCCCTTG-3' | 5'-GGAGAAGTCTTCGGCCATGAC-3'  |
| Human ACSL1                  | 5'-CTTATGGGCTTCGGAGCTTTT-3'   | 5'-CAAGTAGTGCGGATCTTCGTG-3'  |
| Human ACSL3                  | 5'-ATGGAAAACCAACCTCATAGCAA-3' | 5'-GCCATCCCAGTTATACCAGCAA-3' |
| Human ACSL4                  | 5'-ACTGGCCGACCTAAGGGAG-3'     | 5'-GCCAAAGGCAAGTAGCCAATA-3'  |
| Human FATP2                  | 5'-GGCGCTCCTTATGGGTAACG-3'    | 5'-CTTGGCAGTATCTCTTCGACAG-3' |
| Human LPCAT3                 | 5'-GGAGACCTACCTCATCCACCT-3'   | 5'-CGGCCCATTAGTCGAAGGA-3'    |
| Human PLA2G6                 | 5'-CATCACAGCCGTATCATCAGC-3'   | 5'-TCGGTGACATCCATCTGAGTG-3'  |
| Human PLA2G2F                | 5'-AAGGCTGTCACCCCTATGTG-3'    | 5'-CCTCTCGGTACGTCTGGTTCA-3'  |
| Human PLA2G4A                | 5'-TACCAGCACATTATAGTGGAGCA-3' | 5'-GCTGTCAGGGGTTGTAGAGAT-3'  |
| Human PCK1                   | 5'-TTGAGAAAGCGTTCAATGCCA-3'   | 5'-CACGTAGGGTGAATCCGTCAG-3'  |
| Human ALOX15                 | 5'-GGGCAAGGAGACAGAACTCAA-3'   | 5'-CAGCGGTAACAAGGGAACCT-3'   |
| Human PEBP1                  | 5'-CCTGCAAGAAGTGACGAG-3'      | 5'-ACCAAGGTGTAGAGCTTCCCT-3'  |
| Primer sequences for siRNA   |                               |                              |

|                 |                              |                              |
|-----------------|------------------------------|------------------------------|
| Human PCK2-1    | 5'-GAUGAGGUUUUGACAGUGAATT-3' | 5'-UUCACUGUCAAAACCUCAUCTT-3' |
| Human PCK2-2    | 5'-CCCAAGUACAAUAAACUGCUTT-3' | 5'-AGCAGUUUUGUACUUGGGTT-3'   |
| Human AIFM2-1   | 5'-GGGCAAGUUUAAUGAGGUUTT-3'  | 5'-AACCUCAUUAAACUUGCCCTT-3'  |
| Human AIFM2-2   | 5'-GCUGCCUCUCAAUAGAGUAUTT-3' | 5'-AUACUCAUUGAGAGGCAGCTT-3'  |
| Human HERC6-1   | 5'-GCACACACUGCGGUGCUUATT-3'  | 5'-UAAGCACCGCAGUGUGUGCTT-3'  |
| Human HERC6-2   | 5'-GCUGAUCCAGAUGCUUAAATT-3'  | 5'-UUUAAGCAUCUGGAUCAGCTT-3'  |
| Human TRIM47-1  | 5'-GGGACUAAUUCCUCAAGUUTT-3'  | 5'-AACUUGAGGAAAUAGUCCCTT-3'  |
| Human TRIM47-2  | 5'-GCAGCUGUUUGGAACCAAATT-3'  | 5'-UUUGGUUCCAAACAGCUGCTT-3'  |
| Human PKM-1     | 5'-GAUCAGUGGAGACGUUGAATT-3'  | 5'-UUCAACGUCUCCACUGAUCTT-3'  |
| Human PKM-2     | 5'-GAUAACGCCUACAUGGAAATT-3'  | 5'-UUUCCAUGUAGGCGUUAUCTT-3'  |
| Human PFKP-1    | 5'-GGGCCAAGGUGUACUUCAUTT-3'  | 5'-AUGAAGUACACCUUGGCCCTT-3'  |
| Human PFKP-2    | 5'-GCUCCAUCGACAAUGAUUUTT-3'  | 5'-AAAUCAUUGUCGAUGGAGCTT-3'  |
| Human PPM1G-1   | 5'-GCAAGCUACAGAAGGCUUUTT-3'  | 5'-AAAGCCUUCUGUAGCUUGCTT-3'  |
| Human PPM1G-2   | 5'-CCUGAGGAACAGAUGAUUUTT-3'  | 5'-AAAUCAUCUGUUCCUCAGGTT-3'  |
| Human SOX2-1    | 5'-CUGCAGUACAACUCCAUGATT-3'  | 5'-UCAUGGAGUUGUACUGCAGTT-3'  |
| Human SOX2-2    | 5'-GCUCGCAGACCUACAUGAATT-3'  | 5'-UUCAUGUAGGUCUGCGAGCTT-3'  |
| Human STAT3-1   | 5'-GCUGAACAACAUGUCAUUUTT-3'  | 5'-AAAUGACAUGUUGUUCAGCTT-3'  |
| Human STAT3-2   | 5'-GCAACAGAUUGCCUGCAUUTT-3'  | 5'-AAUGCAGGCAAUCUGUUGCTT-3'  |
| Human BMI1-1    | 5'-GCCACAACCAUAAUAGAAUTT-3'  | 5'-AUUCUAAUUAUGGUUGUGGCTT-3' |
| Human BMI1-2    | 5'-CCUGGAGACCAGCAAGUAUTT-3'  | 5'-AUACUUGCUGGUCUCCAGGTT-3'  |
| Human NANOG-1   | 5'-GACCAGAACUGUGUUCUCUTT-3'  | 5'-AGAGAACACAGUUCUGGUCTT-3'  |
| Human NANOG-2   | 5'-GCAUCCGACUGUAAAGAAUTT-3'  | 5'-AUUCUUUACAGUCGGAUGCTT-3'  |
| Human LPCAT3-1  | 5'-CCGGCAACUACGAUAUCAATT-3'  | 5'-UUGAUUUCGUAGUUGCCGGTT-3'  |
| Human LPCAT3-2  | 5'-GGAGGGAAAGAUCAAGAUUTT-3'  | 5'-AAUUCUGAUCUUUCCCUCCTT-3'  |
| Human PLA2G6-1  | 5'-CCAGCUGCUACCCUUCUAUTT-3'  | 5'-AUAGAAGGGUAGCAGCUGGTT-3'  |
| Human PLA2G6-2  | 5'-CUGGCCAUGUCGAAAGACATT-3'  | 5'-UGUCUUUCGACAUGGCCAGTT-3'  |
| Human PLA2G4A-1 | 5'-CCAGUAUUCCCACAAGUUUTT-3'  | 5'-AAACUUGUGGGAAUACUGGTT-3'  |

|                            |                                 |                                 |
|----------------------------|---------------------------------|---------------------------------|
| Human PLA2G4A-2            | 5'-CCUGGUAUAUGUCAACCUUTT-3'     | 5'-AAGGUUGACAUAUACCAGGTT-3'     |
| Human ACSL1-1              | 5'-GGUGAUCGUUCCACUUUAUTT-3'     | 5'-AUAAGUGGAACGAUCACCTT-3'      |
| Human ACSL1-2              | 5'-CCUGAAGAUCUUGCAGUAATT-3'     | 5'-UUACUGCAAGAUCUUCAGGTT-3'     |
| Human ACSL3-1              | 5'-CCCGAUGGAUGCUUAAAGATT-3'     | 5'-UCUUUAAGCAUCCAUCGGGTT-3'     |
| Human ACSL3-2              | 5'-GGUUAUUCUUGGACAGUAUTT-3'     | 5'-AUACUGUCCAAGAAUAACCTT-3'     |
| Human ACSL4-1              | 5'-GCAAUUUGAUAGCUGGAUTT-3'      | 5'-AUUCCAGCUAUCAAAUUGCTT-3'     |
| Human ACSL4-2              | 5'-GCAGAGAUUUCUUGCUUUATT-3'     | 5'-UAAAGCAAGAUUUCUGCTT-3'       |
| Human SLC27A2-1            | 5'-GGUGUCGCCAGAACUACAATT-3'     | 5'-UUGUAGUUCUGGCGACACCTT-3'     |
| Human SLC27A2-2            | 5'-UCACACAACUACACCAUUTT-3'      | 5'-AAUGGUGUAAGUUGUGUGATT-3'     |
| Primer sequences for sgRNA |                                 |                                 |
| Human ACSL4-1              | 5'-CACCGAAGTGTGTGACAGAGCGATA-3' | 5'-AACTATCGCTCTGTCACACACTTC-3'  |
| Human ACSL4-2              | 5'-CACCGCTAGCTGTAATAGACATCCC-3' | 5'-AAACGGGATGTCTATTACAGCTAGC-3' |
| Human ACSL4-3              | 5'-CACCGTGCCAAGAAGAAAAACGCTA-3' | 5'-AACTAGCGTTTTTCTTCTTGGCAC-3'  |
| Human PCK2-1               | 5'-CACCGCCACATCTGTGATGGAAGT-3'  | 5'-AAACAGTTCCATCACAGATGTGGA-3'  |
| Human PCK2-2               | 5'-CACCGCTGACCCTGCTGGAGCAGCA-3' | 5'-AACTGCTGCTCCAGCAGGGTCAGA-3'  |
| Human PCK2-3               | 5'-CACCGACAAAATCTCGAATGCCAGT-3' | 5'-AAACTGCGCATTCGAGATTTTGTA-3'  |
| Human STAT3-1              | 5'-CACCGAGCTACAGCAGCTTGACACA-3' | 5'-AACTGTGTCAAGCTGCTGTAGCTC-3'  |
| Human STAT3-2              | 5'-CACCGCTACAGTGACAGCTTCCCAA-3' | 5'-AACTTGGGAAGCTGTCACTGTAGC-3'  |
| Human STAT3-3              | 5'-CACCGAATCTTGACTCTCAATCCAA-3' | 5'-AACTTGGATTGAGAGTCAAGATTC-3'  |
| Human HERC6-1              | 5'-CACCGCCTGCAGTAGCTCAGCCCCG-3' | 5'-AAACCGGGGCTGAGCTACTGCAGGC-3' |
| Human HERC6-2              | 5'-CACCGGCTGCTGCTGACCAACCACA-3' | 5'-AACTGTGGTTGGTCAGCAGCAGCC-3'  |
| Human HERC6-3              | 5'-CACCGCCAGGGAGCTGCAGCGCCGG-3' | 5'-AAACCCGGCGCTGCAGCTCCCTGGC-3' |

**Supplementary Table 5.** List of antibodies used in this study.

| Antibodies used for Western blotting (WB), immunoprecipitation (IP) and immunofluorescence (IF) |                           |           |             |              |                  |       |                                            |
|-------------------------------------------------------------------------------------------------|---------------------------|-----------|-------------|--------------|------------------|-------|--------------------------------------------|
| Antibodies                                                                                      | Supplier                  | Catalogue | Application | Host species | Species activity | clone | Dilution                                   |
| anti-mouse IgG, HRP-linked antibody                                                             | Cell Signaling Technology | 7076S     | WB          | Horse        | Mo               | N.A   | 1:3000                                     |
| anti-rabbit IgG, HRP-linked antibody                                                            | Cell Signaling Technology | 7074S     | WB          | Goat         | Rabbit           | N.A   | 1:3000                                     |
| anti-PCK2                                                                                       | Cell Signaling Technology | 8565S     | WB, IF, IP  | Rabbit       | Hu               | N.A   | 1:1000 for WB,<br>1:100 for IF, 5µg for IP |
| anti-pStat3                                                                                     | Cell Signaling Technology | 9145      | WB          | Rabbit       | Hu               | N.A   | 1:2000                                     |
| anti-Stat3                                                                                      | Cell Signaling Technology | 9139      | WB          | Mouse        | Hu               | N.A   | 1:2000                                     |
| anti-SOX2                                                                                       | Cell Signaling Technology | 3579      | WB          | Rabbit       | Hu               | N.A   | 1:1000                                     |
| anti-SLC7A11                                                                                    | Cell Signaling Technology | 12691     | WB          | Rabbit       | Hu               | N.A   | 1:1000                                     |
| anti-Ubiquitin                                                                                  | Cell Signaling Technology | 43124S    | WB          | Rabbit       | Hu               | N.A   | 1:1000                                     |
| anti-tubulin                                                                                    | Cell Signaling Technology | 3873      | WB          | Mouse        | Hu               | N.A   | 1:2000                                     |
| anti-β-actin                                                                                    | Cell Signaling Technology | 3700      | WB          | Mouse        | Hu               | N.A   | 1:2000                                     |
| anti-Cytochrome c                                                                               | Cell Signaling Technology | 11940T    | WB          | Rabbit       | Hu               | N.A   | 1:2000                                     |
| anti-Lamin B                                                                                    | Cell Signaling Technology | 13435S    | WB          | Rabbit       | Hu               | N.A   | 1:2000                                     |
| anti-Phospho-AMPKα (Thr172)                                                                     | Cell Signaling Technology | 2535T     | WB          | Rabbit       | Hu               | N.A   | 1:2000                                     |
| anti-AMPKα                                                                                      | Cell Signaling Technology | 5832T     | WB          | Rabbit       | Hu               | N.A   | 1:2000                                     |

|                      |                           |                          |             |        |        |          |                                                 |
|----------------------|---------------------------|--------------------------|-------------|--------|--------|----------|-------------------------------------------------|
| anti-MYC             | Cell Signaling Technology | 2278S                    | WB          | Rabbit | Hu     | N.A      | 1:2000                                          |
| anti-HA              | Cell Signaling Technology | 3724S                    | WB          | Rabbit | Hu     | N.A      | 1:2000                                          |
| anti-Flag            | Cell Signaling Technology | 14793S                   | WB          | Rabbit | Hu     | N.A      | 1:2000                                          |
| anti-PCK2            | Abcam                     | ab70359                  | WB, IHC     | Rabbit | Hu     | N.A      | 1:2000 for WB,<br>1:100 for IHC                 |
| anti-ACSL4           | Abcam                     | ab155282                 | WB, IF, IP  | Rabbit | Hu     | N.A      | 1:2000 for WB,<br>1:300 for IF, 5µg<br>for IP   |
| anti-LPCAT3          | Abcam                     | ab239585                 | WB          | Mouse  | Hu     | N.A      | 1:1000                                          |
| anti-GPX4            | Abcam                     | ab125066                 | WB          | Rabbit | Hu     | N.A      | 1:1000                                          |
| anti-phospho Ser/Thr | Abcam                     | ab17464                  | WB          | Rabbit | Hu     | N.A      | 1:1000                                          |
| anti-TIM22           | Abcam                     | ab167423                 | WB          | Rabbit | Hu     | N.A      | 1:2000                                          |
| anti-MnSOD           | Abcam                     | ab68155                  | WB          | Rabbit | Hu     | EPR2560Y | 1:2000                                          |
| anti-Fibrin          | Merck                     | MABS2155                 | IHC         | Mouse  | Hu     | 59D8     | 1:100                                           |
| anti-iPLA2           | Santa Cruz                | sc-376563                | WB          | Mouse  | Hu     | D-4      | 1:1000                                          |
| anti-FSP1            | Santa Cruz                | sc-377120                | WB          | Mouse  | Hu     | B-6      | 1:1000                                          |
| anti-HERC6           | NOVUS                     | NBP1-<br>55025           | WB          | Rabbit | Hu     | N.A      | 1:1000                                          |
| anti-FATP2           | NOVUS                     | NBP2-<br>37738/6B3<br>A9 | WB          | Mouse  | Hu     | 6B3A9    | 1:1000                                          |
| anti-ACSL4 (pT679)   | Genscript Biotechnology   | N.A                      | WB, IHC, IF | Rabbit | Hu     | N.A      | 1:800 for WB,<br>1:100 for IHC,<br>1:100 for IF |
| Alexa Fluor 488 IgG  | Invitrogen                | A11008                   | IF          | Goat   | Rabbit | N.A      | 1:1000                                          |
| Alexa Fluor 594 IgG  | Invitrogen                | A11012                   | IF          | Goat   | Rabbit | N.A      | 1:1000                                          |

Antibodies used for flow cytometric analysis

| Antibodies                        | Supplier  | Catalogue | Application | Host species | Species activity | clone  | Dilution     |
|-----------------------------------|-----------|-----------|-------------|--------------|------------------|--------|--------------|
| PE anti-human CD326               | Biolegend | 324205    | Fc          | Mouse        | Hu               | 9C4    | 5ug per test |
| APC anti-human CD61               | Biolegend | 336411    | Fc          | Mouse        | Hu               | VI-PL2 | 5ug per test |
| BV421 anti-STAT3 Phospho (Tyr705) | Biolegend | 651009    | Fc          | Mouse        | Hu               | 13A3-1 | 5ug per test |

Source Data-Supplementary Fig. 4

C

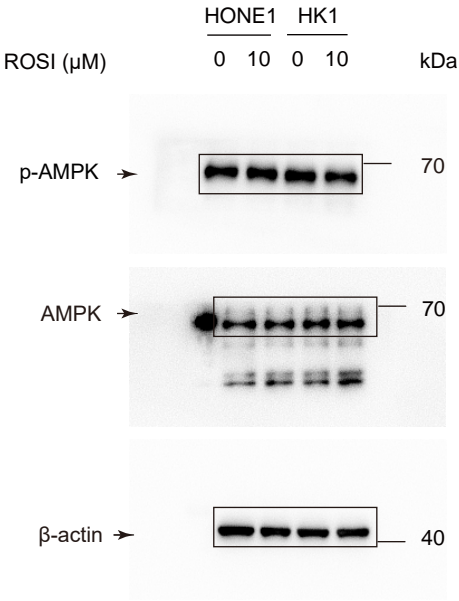

Source Data-Supplementary Fig. 7

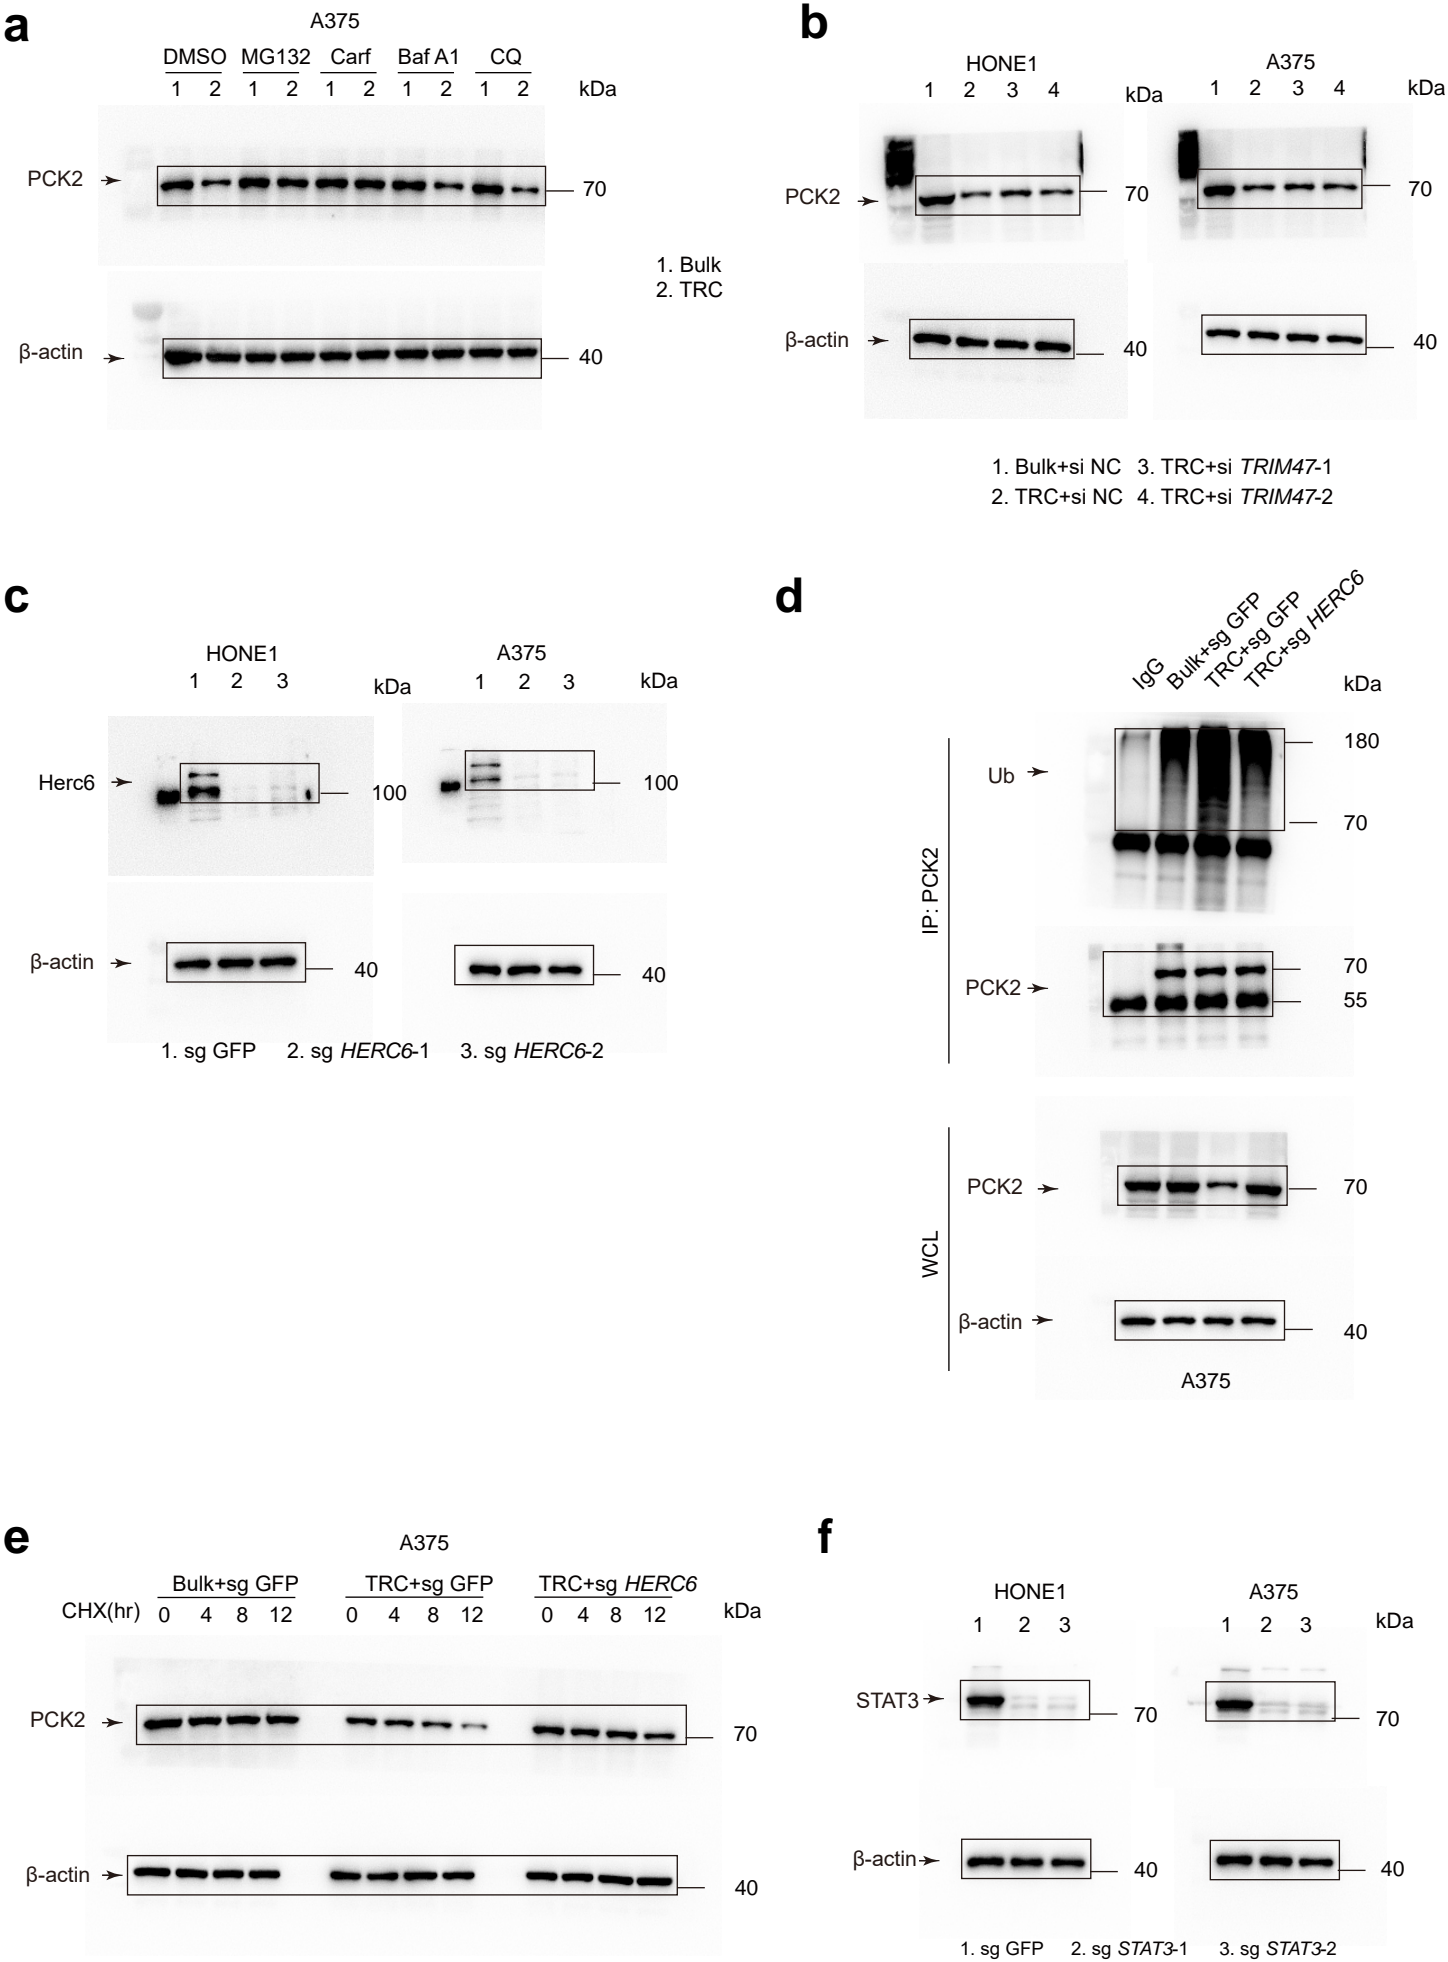

Supplement: Supplementary file 1 — Supplementary Figs. 1–9, Tables 1–5 and Source Data for Supplementary Figs. 4 and 7. [file 41589_2024_1612_MOESM1_ESM.pdf]
